# Supplementary material for: High-Sensitivity Troponin T Testing: Consequences on Daily Clinical Practice and Effects on Diagnosis of Myocardial Infarction
Source: MDPI journal article supplement (doi:10.3390/jcm9030775), 2020-03-12
Supplement: s1 [file s1]

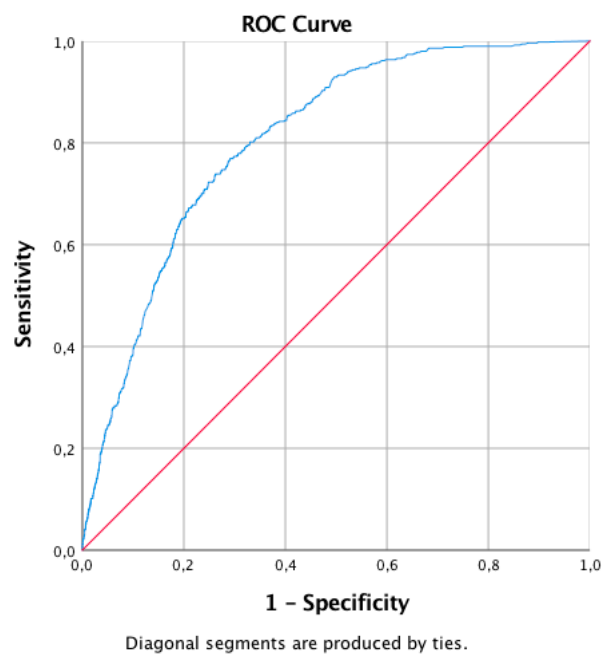

**Figure S1.** ROC Curve for hs-TnT for prediction of in-hospital mortality, AUC = 0.81.

ROC: receiver operating characteristic; AUC: area under the curve; hs-TnT: high-sensitivity troponin T.
